# Supplementary material
Source: PubMed Central journal article supplement (PMC2494981)

**Supplementary Figure 1**  $2F_o - F_c$  omit electron density map for Compound 902 and selected active-site residues of zPIk1 (2.85-Å resolution; PDB ID code 3db6). The map was contoured at the  $1\sigma$  level and displayed as blue meshes with carbon atoms shown in green, nitrogens in blue, oxygens in red, sulfurs in orange, and fluorines in grey. Selected amino acid residues referred to often in the manuscript are displayed as sticks, others as lines. (a) Map without Compound 902. (b) Map with Compound 902 modeled in.

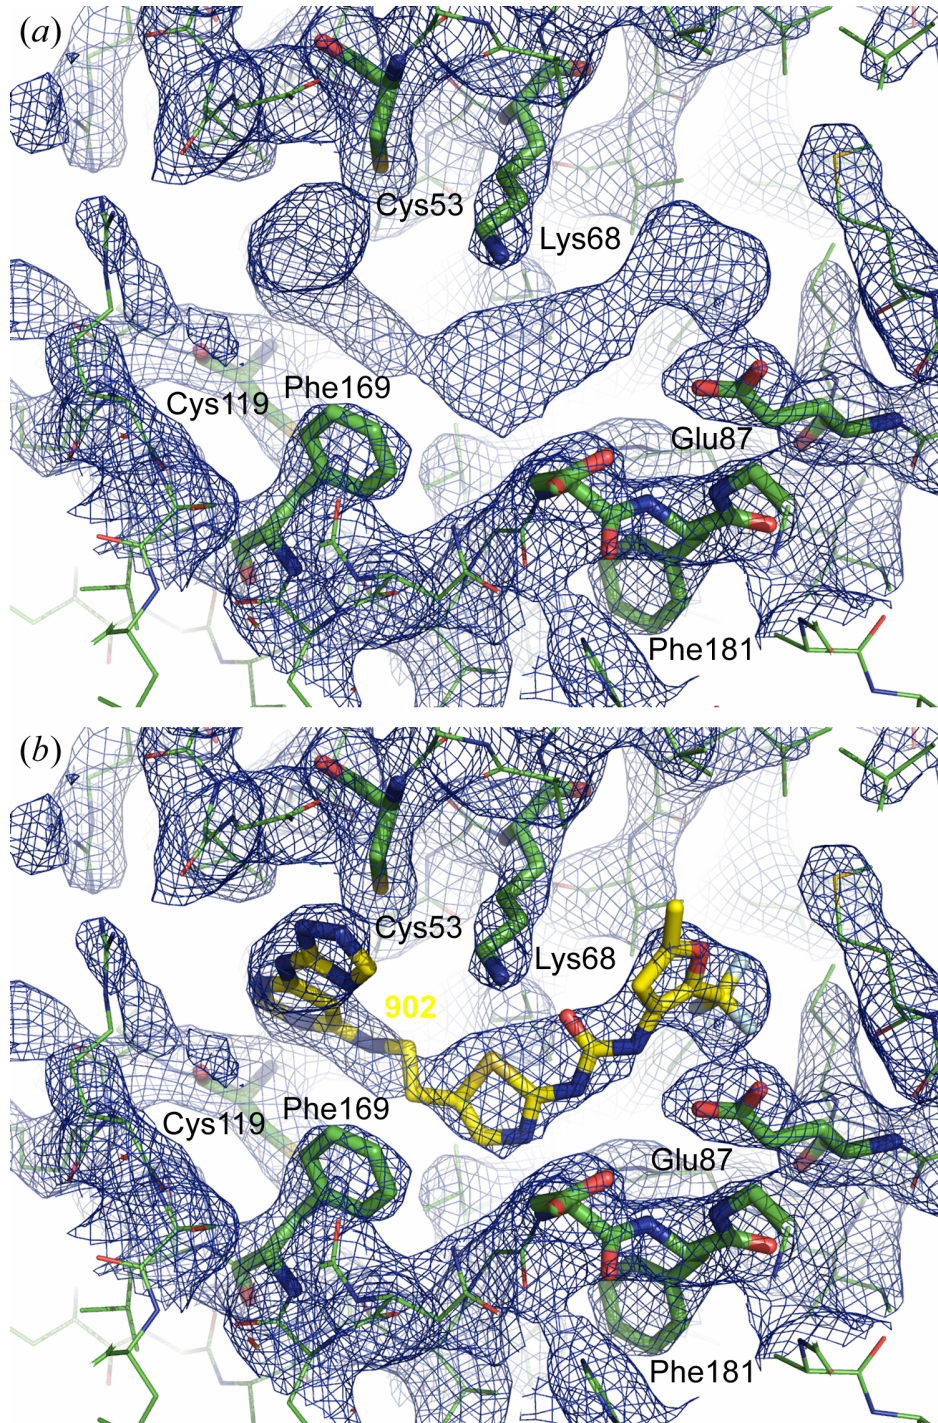

Supplement: f-64-00686-sup1.pdf [file f-64-00686-sup1.pdf]
